# Supplementary material
Source: PubMed Central journal article supplement (PMC6715113)
Supplement: supp_7.3.E504_2018-0204-1-at.pdf [file supp_7.3.E504_2018-0204-1-at.pdf]

## Appendix 1 (as supplied by the authors): Indigenous research principles

| Characteristic                       | TCPS2                                                                                                                                                      | OCAP® <sup>1</sup>                                                                                                                                                                                                                                                                                             | The National Inuit Strategy on Research                                                                                               | Principles of Ethical Métis Research.                                                                                                                     |
|--------------------------------------|------------------------------------------------------------------------------------------------------------------------------------------------------------|----------------------------------------------------------------------------------------------------------------------------------------------------------------------------------------------------------------------------------------------------------------------------------------------------------------|---------------------------------------------------------------------------------------------------------------------------------------|-----------------------------------------------------------------------------------------------------------------------------------------------------------|
| Year Established                     | 2008                                                                                                                                                       | 1998                                                                                                                                                                                                                                                                                                           | 2018                                                                                                                                  | 2010                                                                                                                                                      |
| Stakeholders involved in development | The Canadian Institutes of Health Research<br>The Natural Sciences and Engineering Research Council<br>The Social Sciences and Humanities Research Council | The National Steering Committee of the First Nations and Inuit Regional Longitudinal Health Survey, a precursor of the First Nations Regional Health Survey.<br>The National Health Survey evolved into the First Nations Information Governance Committee, which operates with the Assembly of First Nations. | Inuit Tapiriit Kanatami the national representational organization for the Inuit in Canada<br>Inuit Qaujisarvingat National Committee | Métis research principles were previously developed through the National Aboriginal Health Organization, which has since ceased operations.               |
| Context and Guiding principles       | A framework for research with First Nations, Inuit and Métis Peoples of Canada, while                                                                      | 1) Ownership<br>2) Control<br>3) Access<br>4) Possession:                                                                                                                                                                                                                                                      | 5 priority areas:<br>1) Inuit governance<br>2) Ethical Conduct<br>3) Align funding with Inuit research priorities                     | 1) Reciprocal relationships<br>2) Respect for Métis autonomy and collectiveness, local community protocols, confidentiality, and personal Métis identity; |

<sup>1</sup> OCAP® is a registered trademark of the First Nations Information Governance Centre (FNIGC) ([www.FNIGC.ca/OCAP](http://www.FNIGC.ca/OCAP))

|           |                                                                                                                                                                                                                                                                                                                                                                     |                                                                                                                                                                             |                                                                                                                           |                                                                                                                                                                                                                                                                                                                                                                                                                                                       |
|-----------|---------------------------------------------------------------------------------------------------------------------------------------------------------------------------------------------------------------------------------------------------------------------------------------------------------------------------------------------------------------------|-----------------------------------------------------------------------------------------------------------------------------------------------------------------------------|---------------------------------------------------------------------------------------------------------------------------|-------------------------------------------------------------------------------------------------------------------------------------------------------------------------------------------------------------------------------------------------------------------------------------------------------------------------------------------------------------------------------------------------------------------------------------------------------|
|           | <p>recognizing the impossibility of creating a pan-Aboriginal approach. Aims to compliment Individual community principles.</p> <p>Guiding Principles:</p> <ol style="list-style-type: none"> <li>1) Respect for Persons</li> <li>2) Justice</li> <li>3) Concern for Welfare</li> </ol> <p>The above research principles are interpreted in Aboriginal Contexts</p> | <p>Communities ownership and continued access to their collective data throughout the research process, including controlling how data are interpreted and disseminated</p> | <ol style="list-style-type: none"> <li>4) Access, ownership, and control</li> <li>5) Build capacity Principles</li> </ol> | <ol style="list-style-type: none"> <li>3) Safe and inclusive environments for the research;</li> <li>4) Consideration for the diversity of Métis perspectives;</li> <li>5) Researcher responsibilities of ensuring research benefits and relevancy, accuracy, accountability, acknowledgement of participants and protection of cultural knowledge;</li> <li>6) Familiarity of the researcher with Métis cultural and historical contexts.</li> </ol> |
| Reference | <p>TCPS 2 - Chapter 9- Research Involving the First Nations, Inuit and Métis Peoples Of Canada. 2014.</p>                                                                                                                                                                                                                                                           | <p>Ownership, Control, Access and Possession (OCAP™): The Path to First Nations Information Governance Ottawa: The First Nations Information Governance Centre; 2014.</p>   | <p>National Inuit Strategy on Research. Inuit Tapiriit Kanatami; 2018.</p>                                                | <p>Principles of Ethical Métis Research. National Aboriginal Health Organization and the Métis Centre at NAHO; 2010.</p>                                                                                                                                                                                                                                                                                                                              |
