# Supplementary material
Source: PubMed Central journal article supplement (PMC6715113)
Supplement: supp_7.3.E504_2018-0204-2-at.pdf [file supp_7.3.E504_2018-0204-2-at.pdf]

## **Appendix 2 (as supplied by the authors): Sampling strategy**

### Faculties searched

1. The Faculty of Medicine
2. The Faculty of Dentistry
3. The Lawrence S. Bloomberg Faculty of Nursing
4. The Factor-Intewash Faculty of Social Work
5. The Leslie Dan Faculty of Pharmacy
6. The Dalla Lana School of Public Health
7. The Institute for Health Policy, Management and Evaluation
8. Departments within the School of Graduate Studies

### Academic websites related to Indigenous Health

1. The National Network for Aboriginal Mental Health Research
2. The Indigenous Health Research Development Program
3. The National Collaborating Center for Aboriginal Health.
