# Supplementary material
Source: PubMed Central journal article supplement (PMC6715113)
Supplement: supp_7.3.E504_2018-0204-3-at.pdf [file supp_7.3.E504_2018-0204-3-at.pdf]

## Appendix 3 (as supplied by the authors): Interview guide

[Obtain consent prior to interview]

| Main Question                                                                                                                                                                                                                                                          | Examples of potential additional probing questions (May not be asked)                                                                                                                                                                                                                                                                                                                                                                         |
|------------------------------------------------------------------------------------------------------------------------------------------------------------------------------------------------------------------------------------------------------------------------|-----------------------------------------------------------------------------------------------------------------------------------------------------------------------------------------------------------------------------------------------------------------------------------------------------------------------------------------------------------------------------------------------------------------------------------------------|
| <p><b>Identity:</b></p> <p>1. Do you identify as Indigenous? [To ensure participant meets inclusion criteria; answer should be no]</p>                                                                                                                                 |                                                                                                                                                                                                                                                                                                                                                                                                                                               |
| <p><b>Motivation</b></p> <p>2. What was your motivation in pursuing research with or about Indigenous communities?</p>                                                                                                                                                 |                                                                                                                                                                                                                                                                                                                                                                                                                                               |
| <p><b>Approach</b></p> <p>3. What is your approach to Indigenous health research?</p> <p>4. What do you feel are the strengths and weaknesses of your approach?</p> <p>5. How does your work with Indigenous communities differ from your other research projects?</p> | <p>a) Do you involve/consult specific community members at any point in the process?</p> <p>    a. How do you develop a research question?</p> <p>    b. How do you go about designing a methodology?</p> <p>    c. What are some of the methodologies you employ for data collection?</p> <p>    d. What informs your analysis of the data?</p> <p>    e. What are your approaches to dissemination/publication/translation into action?</p> |
| <p><b>Knowledge and understanding:</b></p> <p>6. Are there any policy statements that you consult when designing a research project?</p> <p>7. What does coproduction mean to you?</p>                                                                                 | <p>a) Specifically, are you familiar with the Tri-council agreement?</p> <p>b) Do you consult the specific policies of</p> <p>    a. CIHR</p> <p>    b. NSERC</p> <p>    c. SSHRC</p>                                                                                                                                                                                                                                                         |
| <p><b>Personal experience</b></p> <p>8. What are some challenges (logistical, ethical) that you've encountered during your work with Indigenous communities</p>                                                                                                        | <p>a) What change would you make, if any, to the current research/ethics requirements concerning work indigenous health research</p> <p>b) How have you approached the resolution of any ethical dilemmas?</p>                                                                                                                                                                                                                                |
